# Supplementary material for: High-altitude hypoxia exposure inhibits erythrophagocytosis by inducing macrophage ferroptosis in the spleen
Source: eLife journal article supplement (doi:10.7554/elife.87496), 2023-05-23

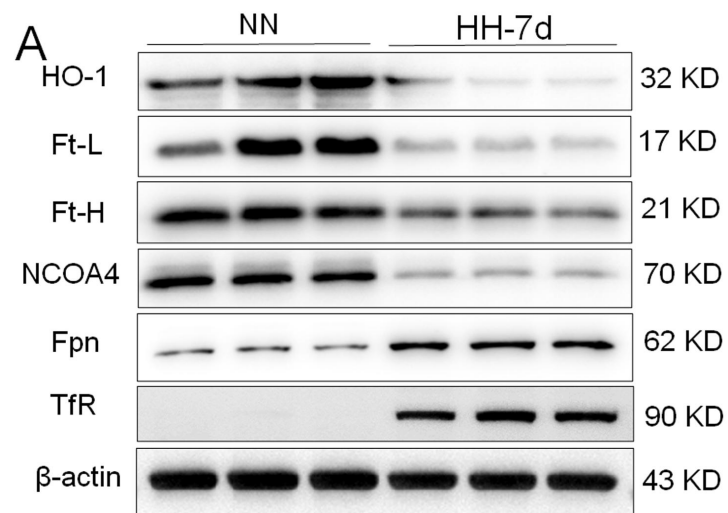

Figure 8A-7d-HO-1-32KD

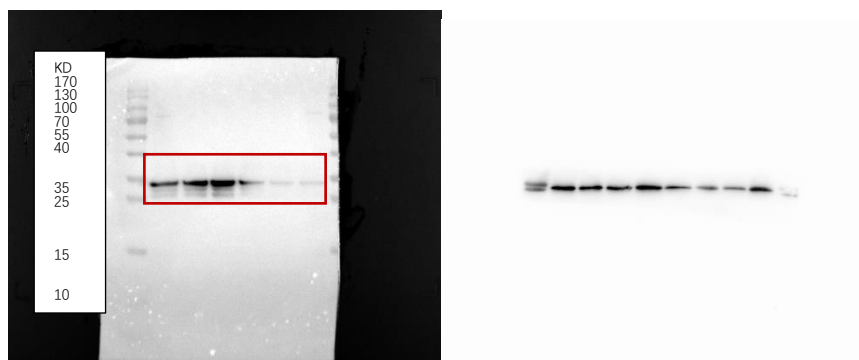

Figure 8A-7d-TfR-90KD

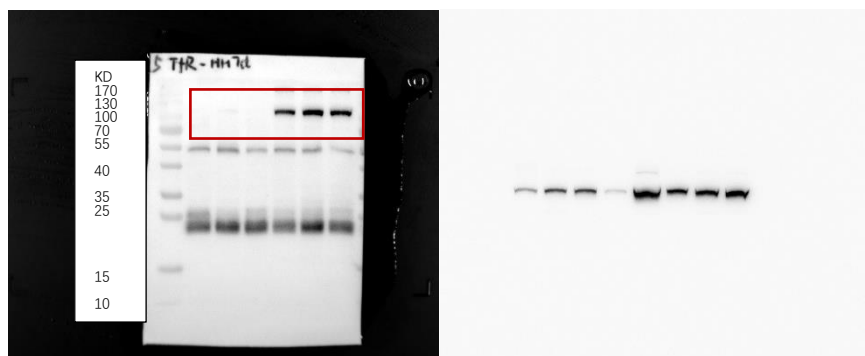

Figure 8A-7d-Ft-H-21KD

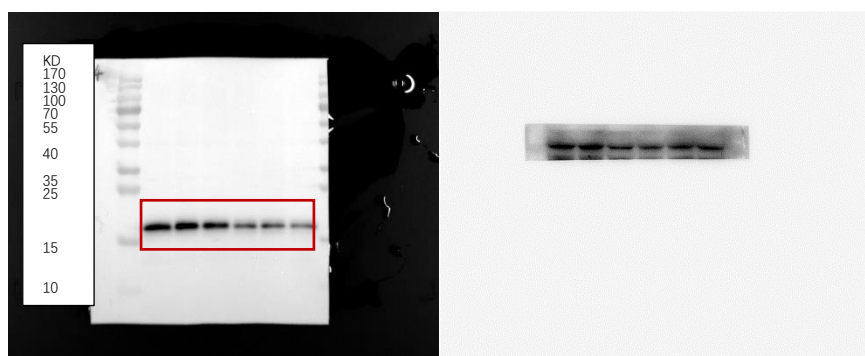

Figure 8A-7d-Ft-L-17KD

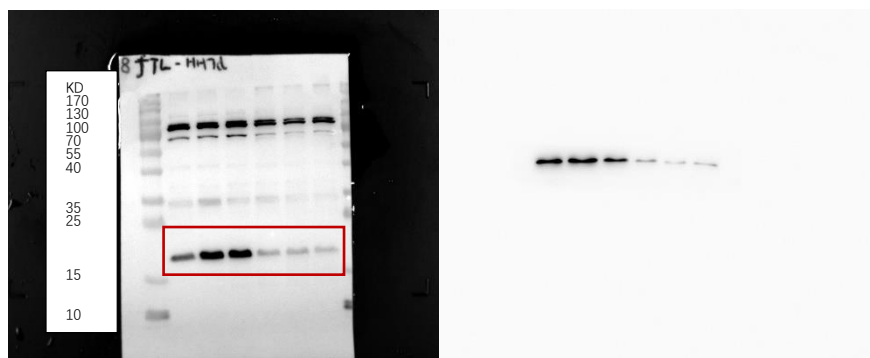

Figure 8A-7d-Fpn-62KD

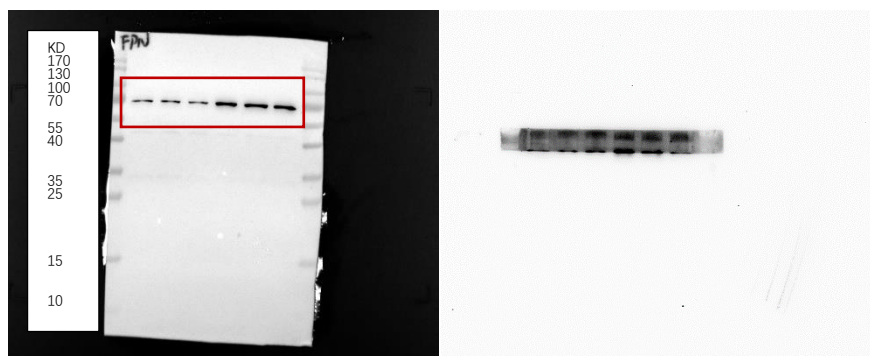

Figure 8A-7d-NCOA4-70KD

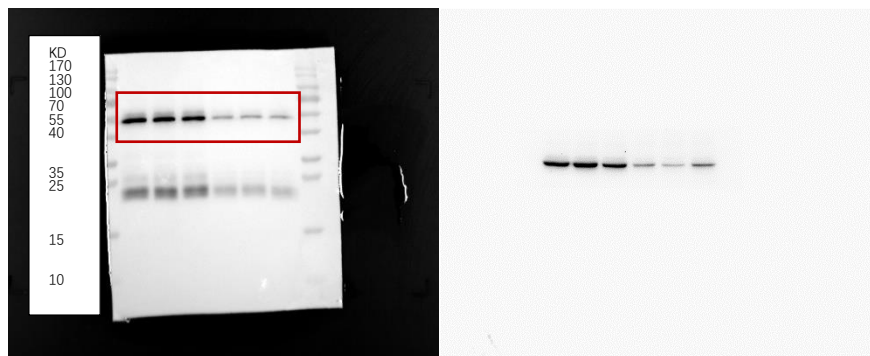

Figure 8A-7d- $\beta$ -actin-43KD

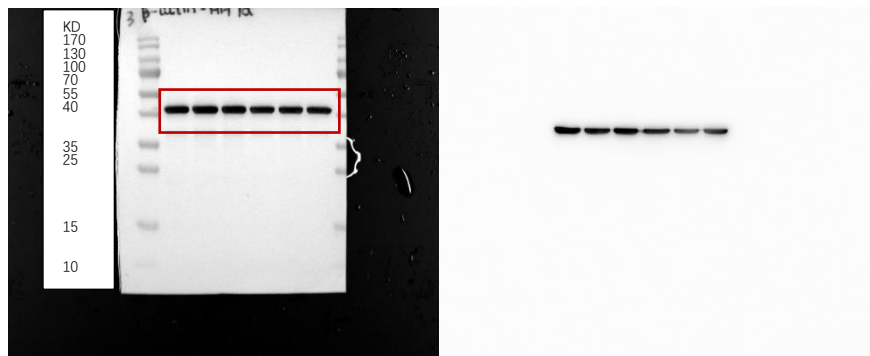

Supplement: fig8-data1 [file elife-87496-fig8-data1-v1.zip]
