# Supplementary figures and images for: High-altitude hypoxia exposure inhibits erythrophagocytosis by inducing macrophage ferroptosis in the spleen
Source: eLife journal article supplement (doi:10.7554/elife.87496), 2023-05-23

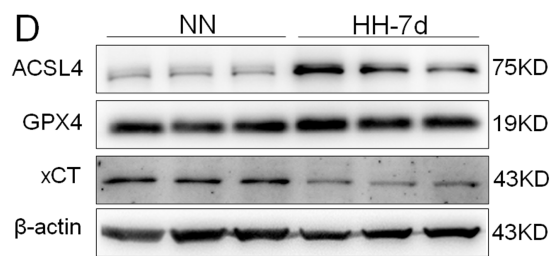

Figure 8D-7d-ACSL4-75KD

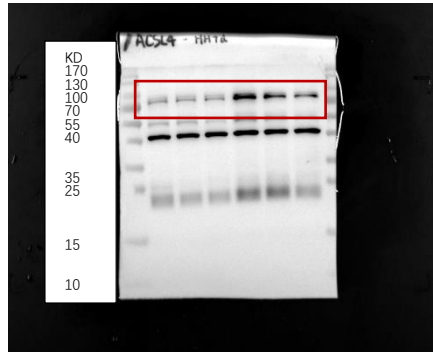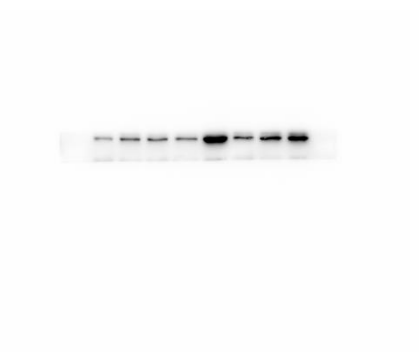

Figure 8D-7d-GPX4-19KD

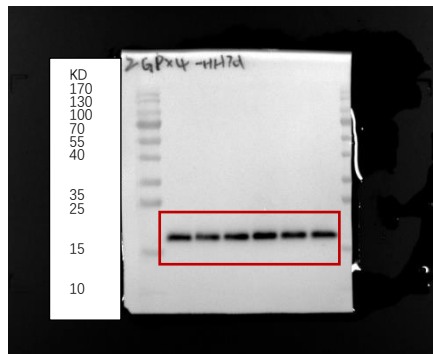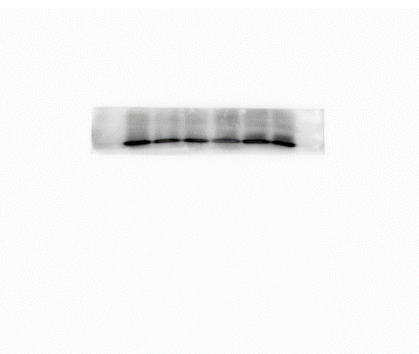

Figure 8D-7d-xCT -43KD

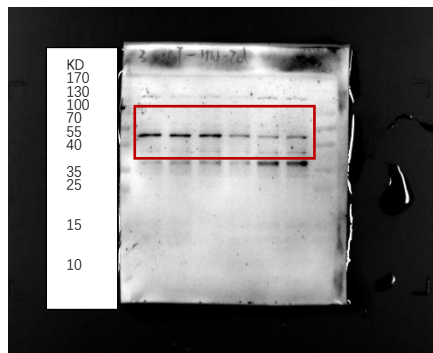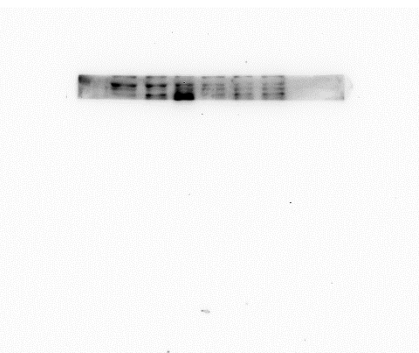

Figure 8D-7d-actin-43KD

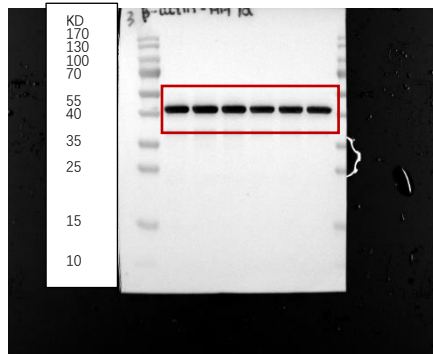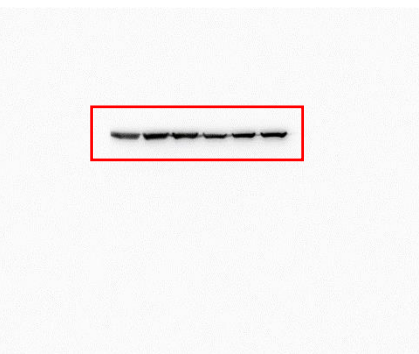

Supplement: fig8-data2 [file elife-87496-fig8-data2-v1.zip]

Figure 9F-ACSL4-75KD

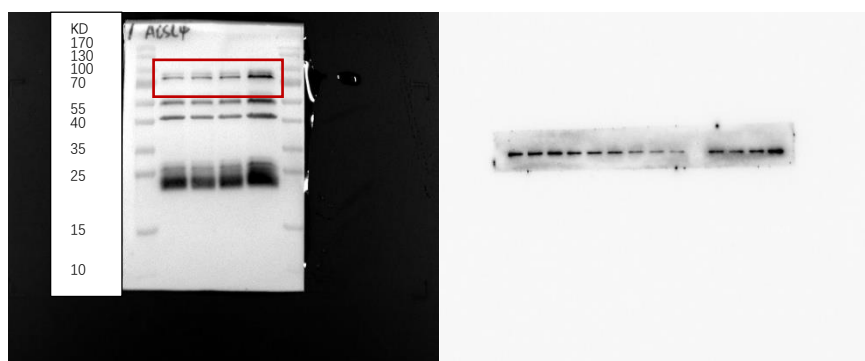

Figure 9F-xCT-43KD

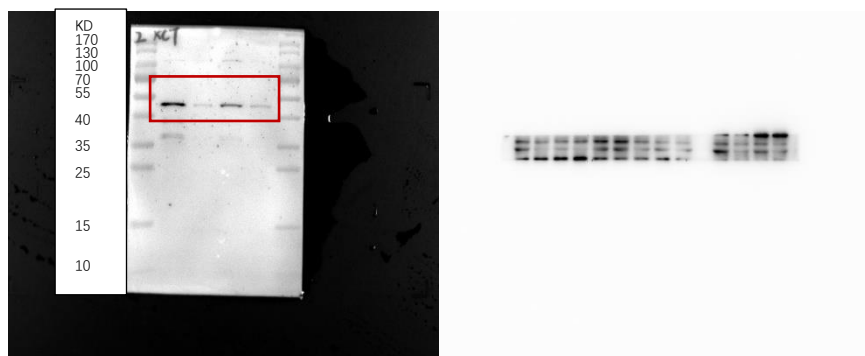

Figure 9F-GPX4-19KD

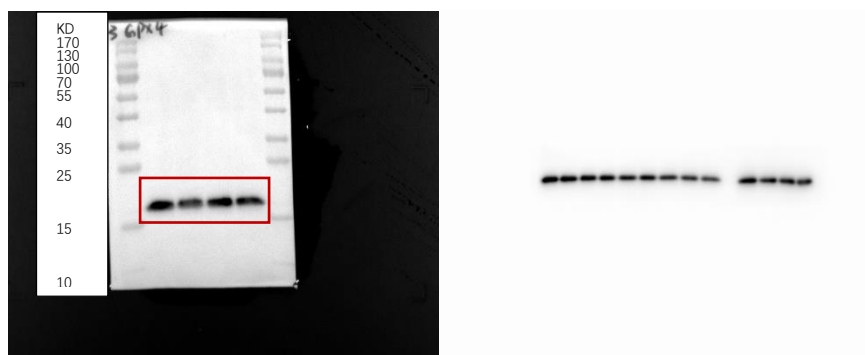

Figure 9F-actin-43KD

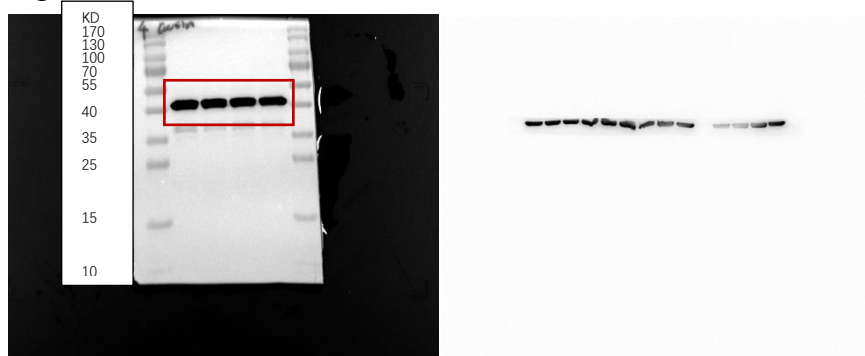

**F**

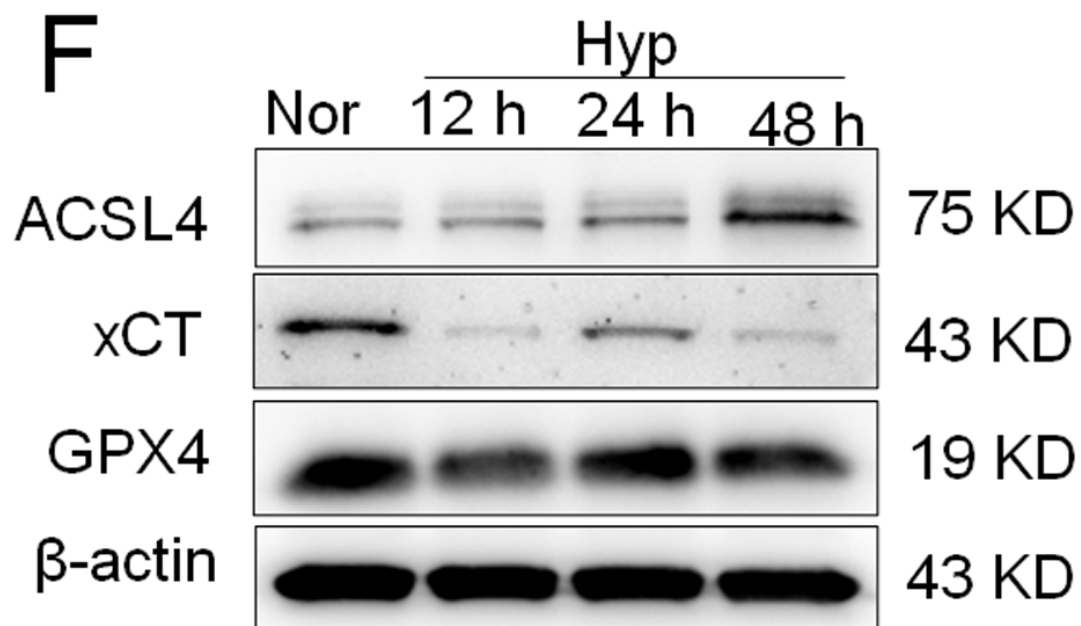

Supplement: fig9-data1 [file elife-87496-fig9-data1-v1.zip]

Figure 9L-ACSL4-75KD

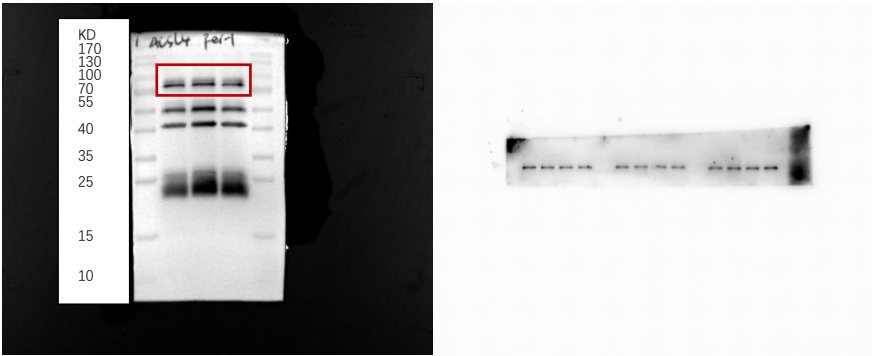

Figure 9L-xCT-43KD

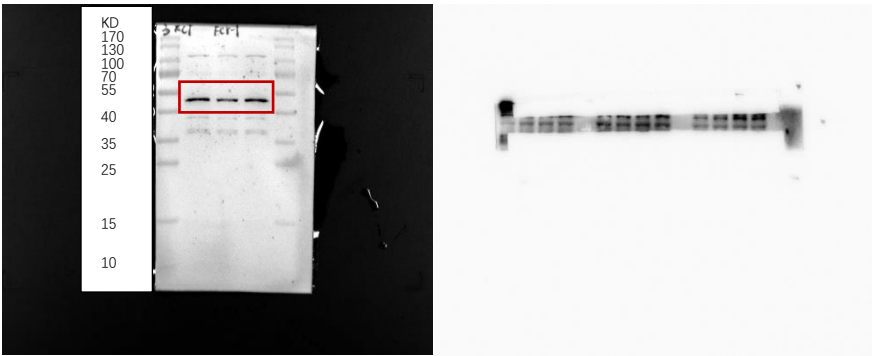

Figure 9L-GPX4-19KD

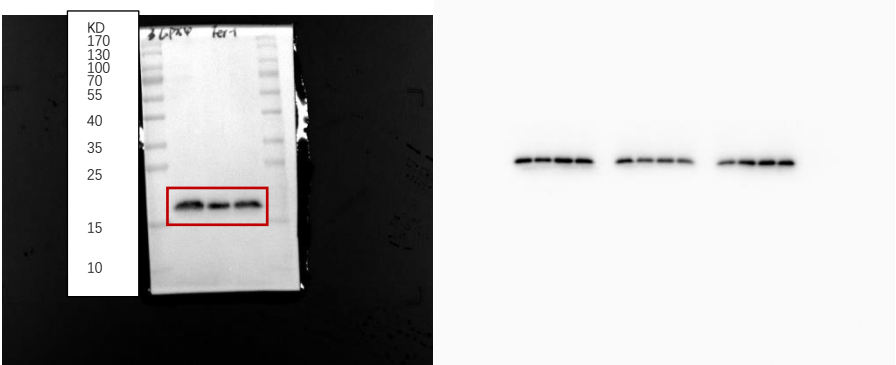

Figure 9L-actin-43KD

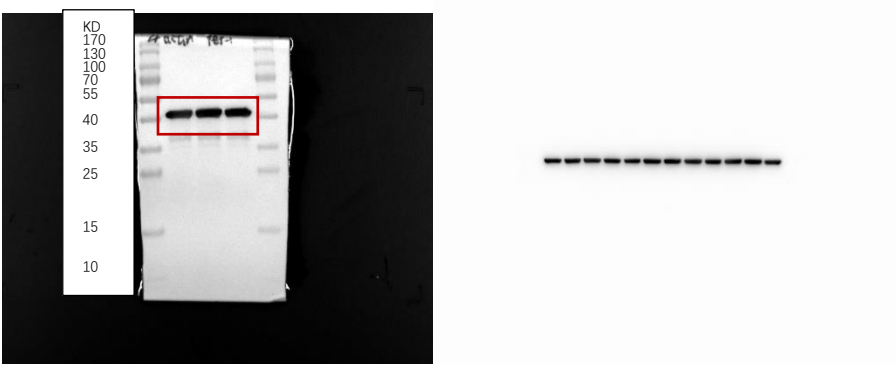

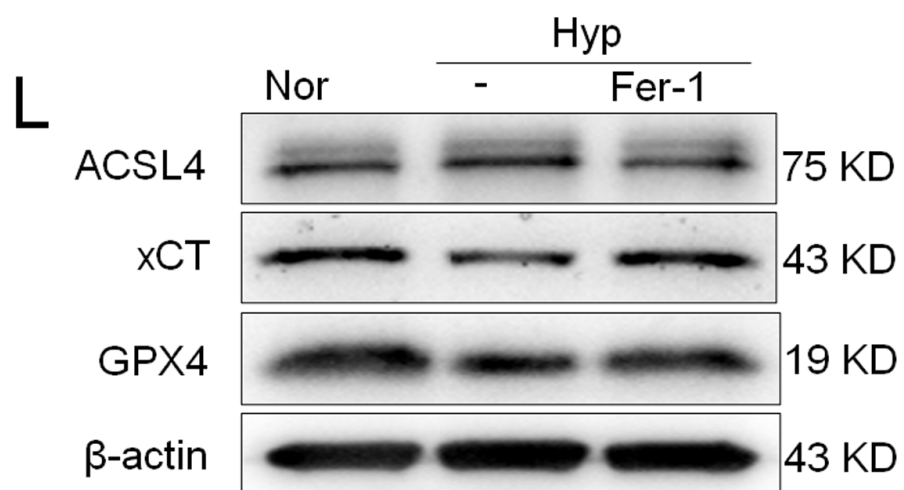

Supplement: fig9-data2 [file elife-87496-fig9-data2-v1.zip]
